# Supplementary material for: A soil diffusion–reaction model for surface COS flux: COSSM v1
Source: Copernicus journal article supplement (doi:10.5194/gmd-8-3055-2015), 2015-10-02
Supplement: Supplementary file 1 [file gmd-8-3055-2015-supplement.pdf]

Supplement of Geosci. Model Dev., 8, 3055–3070, 2015  
<http://www.geosci-model-dev.net/8/3055/2015/>  
doi:10.5194/gmd-8-3055-2015-supplement  
© Author(s) 2015. CC Attribution 3.0 License.

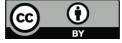

*Supplement of*

## **A soil diffusion–reaction model for surface COS flux: COSSM v1**

**W. Sun et al.**

*Correspondence to:* W. Sun (wu.sun@ucla.edu) and U. Seibt (useibt@ucla.edu)

The copyright of individual parts of the supplement might differ from the CC-BY 3.0 licence.

To demonstrate quantitatively that aqueous diffusive flux is small compared to gaseous diffusive flux, we assume a soil column of vertically uniform profiles of porosity, temperature and moisture,

$$\theta_{\text{sat}} = 0.50 \text{ m}^3 \text{ m}^{-3}$$

$$T = 25^\circ\text{C}$$

$$\theta_{\text{w}} = 0.25 \text{ m}^3 \text{ m}^{-3}$$

The factor  $b$  in Eq. (13) in the main text is set to 5.3 here, without losing generality. The soil gaseous diffusivity for COS calculated based on Eq. (13) in the main text is,  $D_{\text{g}} = 5.64 \times 10^{-7} \text{ m}^2 \text{ s}^{-1}$ . The molecular aqueous diffusivity for COS calculated from Ulshöfer et al. (1996) is  $D_{\text{m, aq}} = 1.94 \times 10^{-9} \text{ m}^2 \text{ s}^{-1}$ . Then by counting the tortuosity effect using Eq. (3) in Moldrup et al. (2003), we obtain the actual soil aqueous diffusivity for COS,  $D_{\text{aq}} = 7.13 \times 10^{-11} \text{ m}^2 \text{ s}^{-1}$ .

We consider the steady-state COS flux of the soil (i.e.  $\partial C/\partial t=0$ ) with a sink proportional to the concentration and no production term. We obtain the equation,

$$D \frac{d^2 C}{dz^2} = -S = kC \quad (1)$$

with the boundary condition  $C(z=0) = C_{\text{atm}}$ . We obtain the general solution,

$$C(z) = C_{\text{atm}} \exp(-\sqrt{k/D} \cdot z) \quad (2)$$

The surface flux is thus

$$F = -D \left. \frac{dC}{dz} \right|_{z=0} = \sqrt{kD} C_{\text{atm}} \quad (3)$$

which is proportional to  $\sqrt{D}$ . We can then calculate the ratio of aqueous diffusive flux ( $F_{\text{aq}}$ ) to gaseous diffusive flux ( $F_{\text{g}}$ ),

$$\frac{F_{\text{aq}}}{F_{\text{g}}} = \sqrt{\frac{D_{\text{aq}}}{D_{\text{g}}}} = 0.0112 \quad (4)$$

Under most conditions, the aqueous diffusive flux is a small fraction of the total flux (Fig. S1). Hence, any errors from neglecting aqueous diffusion are usually small (< 10% at water filled pore space below 83%), except at high soil moisture when the overall flux also tends to be small (see Fig. 9).

## References

- Moldrup, P., Olesen, T., Komatsu, T., Yoshikawa, S., Schjønning, P., and Rolston, D.: Modeling diffusion and reaction in soils: X. A unifying model for solute and gas diffusivity in unsaturated soil, *Soil Science*, 168, 321–337, 2003.
- Ulshöfer, V., Flock, O., Uher, G., and Andreae, M.: Photochemical production and air-sea exchange of carbonyl sulfide in the eastern Mediterranean Sea, *Marine Chemistry*, 53, 25–39, doi:10.1016/0304-4203(96)00010-2, 1996.

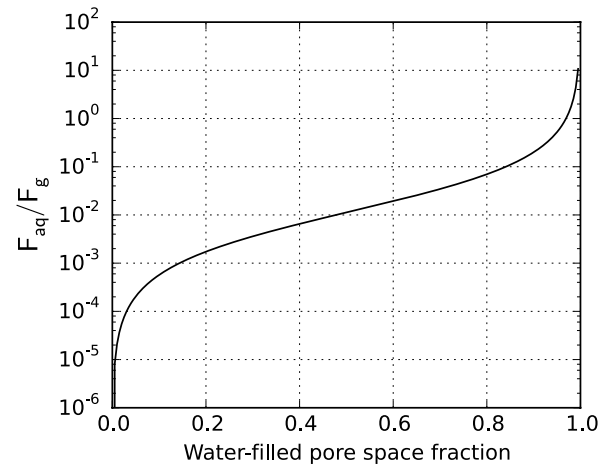

**Figure S1.** The ratio of aqueous flux to gaseous flux for an ideal case with soil porosity  $0.50 \text{ m}^3 \text{ m}^{-3}$ . COS uptake velocity is assumed constant.
